# Supplementary material for: The use of H2O2 over titanium-grafted mesoporous silica catalysts: a step further towards sustainable epoxidation
Source: Royal Society of Chemistry journal article supplement (doi:10.1039/b903302e), 2009-01-01
Supplement: b903302e.pdf [file b903302e.pdf]

## Supplementary Information (ESI)

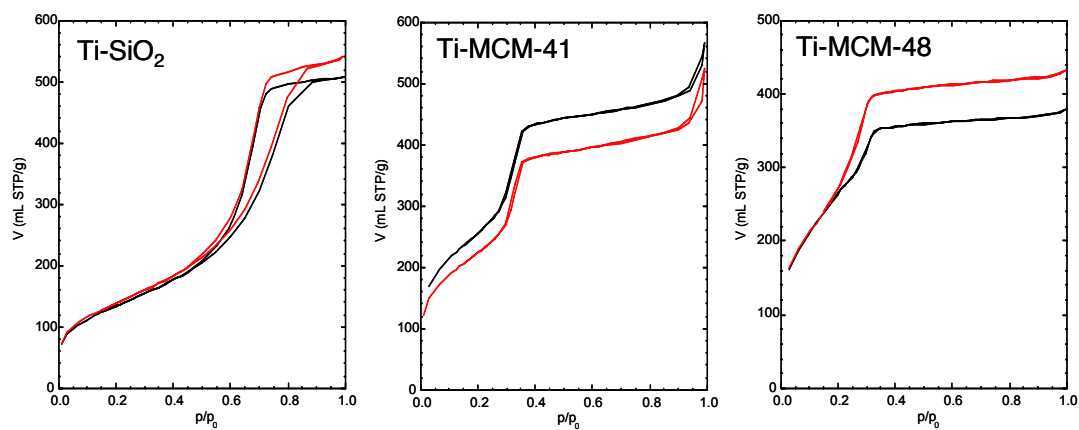

**Figure 1-SI.** Nitrogen sorption isotherms at 77K of calcined Ti-SiO<sub>2</sub> (left), Ti-MCM-41 (middle) and Ti-MCM-48 (right) before (black) and after one-run catalysis (red) in the presence of aqueous H<sub>2</sub>O<sub>2</sub>.

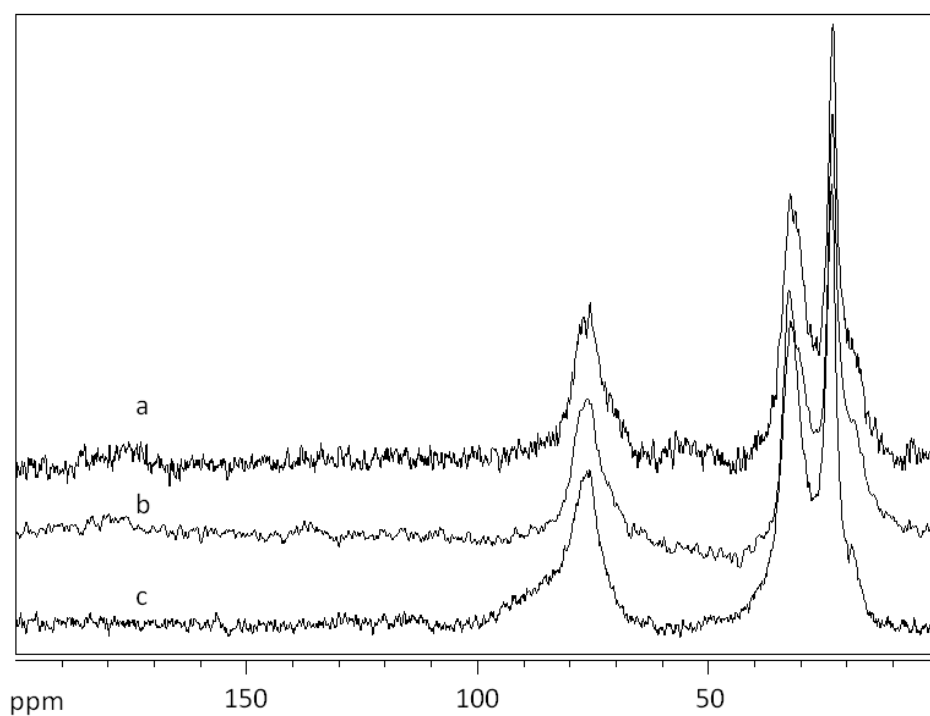

**Figure 2-SI.** <sup>13</sup>C-CP-MAS-NMR spectra of some recovered solids: a) Ti/SiO<sub>2</sub> used in acetonitrile, b) Ti/MCM-41 used in *t*BuOH, c) Ti/SiO<sub>2</sub> used in *t*BuOH.
